# Supplementary material
Source: Springer Nature journal article supplement (https://www.springermedizin.de/resource/supplementary/12889_2010_2207_MOESM1_ESM.pdf/9484968)

REGIONAL LEVEL

INDIVIDUAL LEVEL

**Regional socioeconomic disadvantage**  
- Poverty  
- Unemployment  
- Income inequality

**Living conditions**  
- Conditions of public places  
- Housing quality  
- Water resources  
- Pollution  
- Crime

**Healthcare characteristics**  
- Satisfaction with healthcare  
- Capital intensity in healthcare  
- Share of private healthcare expenditure

**Social/psychological factors**  
- Social isolation

**Health behaviors**  
- Obesity

**Self-rated health**  
- Poor health

**Individual characteristics**  
- Age  
- Gender  
- Marital status  
- Education  
- Employment status

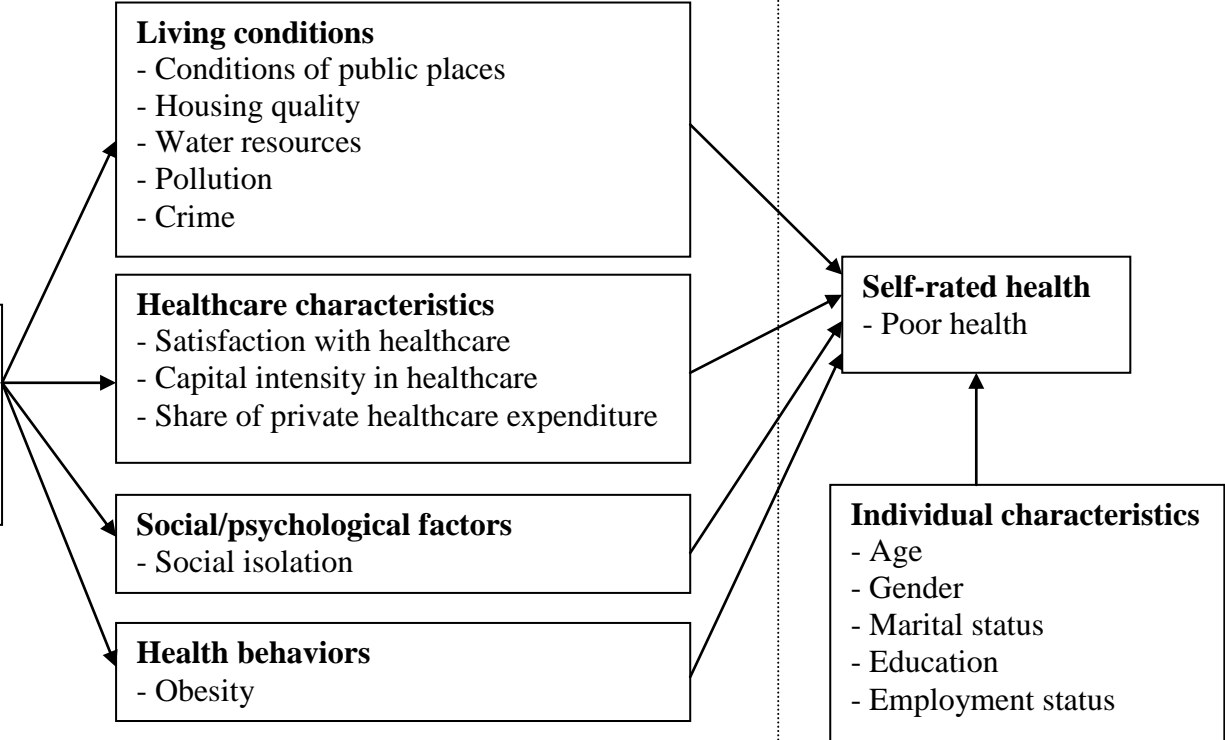

Supplement: MOESM1 [file 9484968]
